# Supplementary material for: Improving Early Detection of Alzheimer's Disease Through MRI Slice Selection and Deep Learning Techniques
Source: Research Square preprint supplement (doi:10.21203/rs.3.rs-6138954/v1), 2025-04-21
Supplement: Supplementary file 1 [file 2bcc647f77f57cb9dfaceef2.docx]

Table 10. z-scores of architectures for manually selected slices in Alzheimer's prediction.

| 1 vs. 1 | CN vs. AD | | | | | |
| --- | --- | --- | --- | --- | --- | --- |
|  | EfficientNetB2 | InceptionV3 | RegNetx006 | Basic ViT | EfficientNetB2+FPN | ViT+EfficientNetB2+FPN |
| EfficientNetB2 |  | **←**0.891 | **↑1.62E-36** | **↑**0.1372 | **↑0.004** | **↑1.92E-16** |
| InceptionV3 |  |  | **↑1.48E-36** | **↑**0.176 | **↑0.007** | **↑1.72E-15** |
| RegNetx006 |  |  |  | **←2,64E-32** | **←9,61E-25** | **←7.93E-08** |
| Basic ViT |  |  |  |  | **↑**0.183 | **↑3.87E-12** |
| EfficientNetB2+FPN |  |  |  |  |  | **↑3.05E-08** |
| ViT+EfficientNetB2+FPN |  |  |  |  |  |  |
|  | CN vs. MCI | | | | | |
| EfficientNetB2 |  | **←1.04E-14** | **↑0.0003** | **←2.27E-15** | **↑0.0002** | **←**0.948 |
| InceptionV3 |  |  | **↑1.03E-25** | **↑**0.579 | **↑1.22E-26** | **↑2.17E-13** |
| RegNetx006 |  |  |  | **←3.25E-28** | **←**1.000 | **←0.0003** |
| Basic ViT |  |  |  |  | **↑2.22E-29** | **↑3.25E-15** |
| EfficientNetB2+FPN |  |  |  |  |  | **←0.0003** |
| ViT+EfficientNetB2+FPN |  |  |  |  |  |  |
|  | CN vs. LMCI | | | | | |
| EfficientNetB2 |  | **←8.11E-07** | **↑7.93E-08** | **←1.30E-17** | **↑2.88E-13** | **↑3.80E-08** |
| InceptionV3 |  |  | **↑2.77E-23** | **←7.29E-05** | **↑5.59E-30** | **↑2.98E-22** |
| RegNetx006 |  |  |  | **←2.17E-38** | **↑0.022** | **←**1.000 |
| Basic ViT |  |  |  |  | **↑4.26E-47** | **↑1.64E-40** |
| EfficientNetB2+FPN |  |  |  |  |  | **←0.031** |
| ViT+EfficientNetB2+FPN |  |  |  |  |  |  |
|  | CN vs. EMCI | | | | | |
| EfficientNetB2 |  | **←0.0042** | **↑0.0106** | **←1.29E-12** | **↑0.016** | **←**0.0784 |
| InceptionV3 |  |  | **↑1.88E-08** | **←8.54E-06** | **↑6.64E-08** | **↑**0.2613 |
| RegNetx006 |  |  |  | **←9.05E-21** | **←**0.8474 | **←1.85E-05** |
| Basic ViT |  |  |  |  | **↑7.42E-21** | **↑4.50E-08** |
| EfficientNetB2+FPN |  |  |  |  |  | **←4.11E-05** |
| ViT+EfficientNetB2+FPN |  |  |  |  |  |  |
|  | AD vs. MCI | | | | | |
| EfficientNetB2 |  | **←0.0001** | **↑0.014** | **←3.02E-14** | **←0.0153** | **↑**0.1408 |
| InceptionV3 |  |  | **↑**0.1573 | **←3.40E-25** | **↑**0.1573 | **↑2.48E-07** |
| RegNetx006 |  |  |  | **←3.58E-21** | **↑**1.0000 | **←0.0002** |
| Basic ViT |  |  |  |  | **↑9.66E-21** | **↑4.20E-10** |
| EfficientNetB2+FPN |  |  |  |  |  | **←1.72E-04** |
| ViT+EfficientNetB2+FPN |  |  |  |  |  |  |
|  | AD vs. LMCI | | | | | |
| EfficientNetB2 |  | **←0.0018** | **←**1.000 | **←0.0184** | **↑**0.2568 | **←0.0018** |
| InceptionV3 |  |  | **↑0.0027** | **↑**0.3692 | **↑1.24E-04** | **←**1.000 |
| RegNetx006 |  |  |  | **←0.0253** | **↑**0.2568 | **←0.0027** |
| Basic ViT |  |  |  |  | **↑0.0016** | **←**0.3841 |
| EfficientNetB2+FPN |  |  |  |  |  | **←1.24E-04** |
| ViT+EfficientNetB2+FPN |  |  |  |  |  |  |
|  | AD vs. EMCI | | | | | |
| EfficientNetB2 |  | **←0.0002** | **↑**1.000 | **←5.93E-06** | **←**1.000 | **←6.44E-04** |
| InceptionV3 |  |  | **↑2.57E-04** | **←**0.2850 | **↑1.62E-04** | **↑**0.7773 |
| RegNetx006 |  |  |  | **←5.93E-06** | **←**1.000 | **←6.44E-04** |
| Basic ViT |  |  |  |  | **↑ 5.93E-06** | **↑**0.1814 |
| EfficientNetB2+FPN |  |  |  |  |  | **←0.0006** |
| ViT+EfficientNetB2+FPN |  |  |  |  |  |  |
|  | MCI vs. LMCI | | | | | |
| EfficientNetB2 |  | **←3.06E-04** | **↑2.59E-04** | **←2.68E-08** | **↑0.024** | **←**0.9136 |
| InceptionV3 |  |  | **↑4.18E-12** | **←0.0287** | **←7.76E-09** | **↑4.07E-04** |
| RegNetx006 |  |  |  | **←1.70E-17** | **←**0.1404 | **←3.36E-04** |
| Basic ViT |  |  |  |  | **↑4.74E-15** | **↑2.09E-08** |
| EfficientNetB2+FPN |  |  |  |  |  | **←0.0201** |
| ViT+EfficientNetB2+FPN |  |  |  |  |  |  |
|  | MCI vs. EMCI | | | | | |
| EfficientNetB2 |  | **←2.30E-12** | **↑0.0330** | **←0.0330** | **↑1.23E-06** | **←**0.6662 |
| InceptionV3 |  |  | **↑6.94E-17** | **↑1.34E-17** | **↑2.01E-26** | **↑4.71E-12** |
| RegNetx006 |  |  |  | **←**1.000 | **↑0.0047** | **←0.0133** |
| Basic ViT |  |  |  |  | **↑0.0039** | **↑0.0123** |
| EfficientNetB2+FPN |  |  |  |  |  | **←2.15E-07** |
| ViT+EfficientNetB2+FPN |  |  |  |  |  |  |
|  | LMCI vs. EMCI | | | | | |
| EfficientNetB2 |  | **←0.0011** | **↑**0.7389 | **←0.0060** | **↑**0.7630 | **←**0.3173 |
| InceptionV3 |  |  | **↑0.0011** | **↑**0.7389 | **↑0.0011** | **↑0.0339** |
| RegNetx006 |  |  |  | **←0.0018** | **↑**1.000 | **↑**0.1655 |
| Basic ViT |  |  |  |  | **↑0.0027** | **↑**0.0588 |
| EfficientNetB2+FPN |  |  |  |  |  | **←**0.1967 |
| ViT+EfficientNetB2+FPN |  |  |  |  |  |  |
