# Supplementary material for: Improving Early Detection of Alzheimer's Disease Through MRI Slice Selection and Deep Learning Techniques
Source: Research Square preprint supplement (doi:10.21203/rs.3.rs-6138954/v1), 2025-04-21
Supplement: Supplementary file 2 [file 2e5981a185f63aa39b911538.docx]

Table 6. Classification results obtained when the models are run 1 vs. 1 (5 slices manually)

| 1 vs. 1 | Models | Accuracy | Precision | Recall | F1 Score | AUC |
| --- | --- | --- | --- | --- | --- | --- |
| CN/AD | EfficientNetB2  InceptionV3  RegNetx006  Basic ViT  EfficientNetB2+FPN (Our Model)  ViT + EfficientNetB2 + FPN (Our Model) | 0.8784  0.8728  **0.9799**  0.8981  0.9076  0.9445 | 0.7425  0.7223  0.9671  0.7617  0.9280  0.8707 | 0.6371  0.6828  0.9561  0.7281  0.9297  0.8483 | 0.6858  0.7020  0.9616  0.7445  0.9288  0.8594 | 0.9330  0.9439  0.9981  0.9582  0.9553  0.9582 |
| CN/MCI | EfficientNetB2  InceptionV3  RegNetx006  Basic ViT  EfficientNetB2+FPN (Our Model)  ViT + EfficientNetB2 + FPN (Our Model) | 0.9539  0.8729  **0.9798**  0.9038  0.9772  0.9510 | 0.9082  0.7193  0.9518  0.7628  0.9461  0.9341 | 0.8872  0.6523  0.9484  0.7411  0.9397  0.8123 | 0.8976  0.6842  0.9501  0.7518  0.9429  0.8690 | 0.9890  0.9344  0.9971  0.9561  0.9959  0.9495 |
| CN/LMCI | EfficientNetB2  InceptionV3  RegNetx006  Basic ViT  EfficientNetB2+FPN (Our Model)  ViT + EfficientNetB2 + FPN (Our Model) | 0.9450  0.8890  0.9789  0.8685  **0.9806**  0.9753 | 0.8560  0.7329  0.9491  0.6918  0.9531  0.9385 | 0.8463  0.7122  0.9464  0.6379  0.9497  0.9382 | 0.8511  0.7224  0.9577  0.6638  0.9514  0.9383 | 0.9829  0.9572  0.9962  0.9381  0.9968  0.9560 |
| CN/EMCI | EfficientNetB2  InceptionV3  RegNetx006  Basic ViT  EfficientNetB2+FPN (Our Model)  ViT + EfficientNetB2 + FPN (Our Model) | 0.9633  0.9093  **0.9782**  0.9079  0.9774  0.9569 | 0.9023  0.7949  0.9485  0.7892  0.9476  0.8953 | 0.8821  0.7289  0.9427  0.7373  0.9391  0.8885 | 0.8923  0.7617  0.9440  0.7640  0.9442  0.8924 | 0.9893  0.9584  0.9965  0.9575  0.9957  0.9512 |
| AD/MCI | EfficientNetB2  InceptionV3  RegNetx006  Basic ViT  EfficientNetB2+FPN (Our Model)  ViT + EfficientNetB2 + FPN (Our Model) | 0.9521  0.8992  0.9765  0.8728  **0.9787**  0.9489 | 0.8824  0.7654  0.9421  0.7091  0.9497  0.8995 | 0.8523  0.7159  0.9382  0.6468  0.9432  0.8383 | 0.8660  0.7429  0.9413  0.6757  0.9460  0.8681 | 0.9781  0.9592  0.9861  0.9355  0.9952  0.9389 |
| AD/LMCI | EfficientNetB2  InceptionV3  RegNetx006  Basic ViT  EfficientNetB2+FPN (Our Model)  ViT + EfficientNetB2 + FPN (Our Model) | 0.9889  0.9592  0.9856  0.9675  **0.9912**  0.9564 | 0.9678  0.8910  0.9868  0.9225  0.9890  0.9095 | 0.9664  0.8718  0.9848  0.9115  0.9871  0.8684 | 0.9670  0.8842  0.9842  0.9162  0.9871  0.8895 | 0.9979  0.9882  0.9959  0.9860  0.9985  0.9257 |
| AD/EMCI | EfficientNetB2  InceptionV3  RegNetx006  Basic ViT  EfficientNetB2+FPN (Our Model)  ViT + EfficientNetB2 + FPN (Our Model) | 0.9878  0.9413  **0.9890**  0.9373  0.9872  0.9564 | 0.9683  0.8583  0.9736  0.8491  0.9699  0.9117 | 0.9582  0.8564  0.9791  0.8274  0.9658  0.8661 | 0.9681  0.8580  0.9730  0.8381  0.9676  0.8891 | 0.9970  0.9774  0.9992  0.9738  0.9967  0.9142 |
| MCI/LMCI | EfficientNetB2  InceptionV3  RegNetx006  Basic ViT  EfficientNetB2+FPN (Our Model)  ViT + EfficientNetB2 + FPN (Our Model) | 0.9592  0.9196  **0.9894**  0.8853  0.9799  0.9554 | 0.9021  0.7781  0.9558  0.7173  0.9517  0.8895 | 0.8883  0.7391  0.9549  0.6838  0.9478  0.8851 | 0.8962  0.7565  0.9550  0.6990  0.9510  0.8877 | 0.9889  0.9683  0.9991  0.9395  0.9963  0.9351 |
| MCI/EMCI | EfficientNetB2  InceptionV3  RegNetx006  Basic ViT  EfficientNetB2+FPN (Our Model)  ViT + EfficientNetB2 + FPN (Our Model) | 0.9502  0.8794  0.9795  0.8884  **0.9827**  0.9458 | 0.9019  0.7384  0.9484  0.7394  0.9603  0.8878 | 0.8868  0.6364  0.9463  0.6771  0.9526  0.8344 | 0.8961  0.6861  0.9449  0.7065  0.9545  0.8605 | 0.9887  0.9481  0.9971  0.9383  0.9967  0.9233 |
| LMCI/EMCI | EfficientNetB2  InceptionV3  RegNetx006  Basic ViT  EfficientNetB2+FPN (Our Model)  ViT + EfficientNetB2 + FPN (Our Model) | 0.9798  0.9393  0.9866  0.9455  **0.9888**  0.9796 | 0.9496  0.8562  0.9674  0.8694  0.9735  0.9490 | 0.9584  0.8382  0.9655  0.8574  0.9707  0.9489 | 0.9552  0.8483  0.9670  0.8658  0.9731  0.9489 | 0.9864  0.9819  0.9975  0.9799  0.9981  0.9459 |
