# Supplementary material for: Improving Early Detection of Alzheimer's Disease Through MRI Slice Selection and Deep Learning Techniques
Source: Research Square preprint supplement (doi:10.21203/rs.3.rs-6138954/v1), 2025-04-21
Supplement: Supplementary file 3 [file 32c9b0746c4ec093972fc5f1.docx]

Table 7. Classification results obtained when the models are run 1 vs. 1 (5 slices with SSIM)

| 1 vs. 1 | Models | Accuracy | Precision | Recall | F1 Score | AUC |
| --- | --- | --- | --- | --- | --- | --- |
| CN/AD | EfficientNetB2  InceptionV3  RegNetx006  Basic ViT  EfficientNetB2+FPN (Our Model)  ViT + EfficientNetB2 + FPN (Our Model) | 0.9756  0.9012  0.9858  0.9128  **0.9881**  0.9859 | 0.9473  0.7627  0.9673  0.7922  0.9718  0.9645 | 0.9423  0.8194  0.9612  0.7582  0.9688  0.9640 | 0.9446  0.7927  0.9670  0.7757  0.9720  0.9646 | 0.9838  0.9719  0.9882  0.9591  0.9982  0.9861 |
| CN/MCI | EfficientNetB2  InceptionV3  RegNetx006  Basic ViT  EfficientNetB2+FPN (Our Model)  ViT + EfficientNetB2 + FPN (Our Model) | 0.9649  0.9283  **0.9891**  0.9172  0.9872  0.9788 | 0.9448  0.8289  0.9718  0.7983  0.9696  0.9469 | 0.9429  0.8194  0.9799  0.7681  0.9664  0.9469 | 0.9440  0.8267  0.9731  0.7824  0.9685  0.9469 | 0.9819  0.9519  0.9995  0.9675  0.9982  0.9711 |
| CN/LMCI | EfficientNetB2  InceptionV3  RegNetx006  Basic ViT  EfficientNetB2+FPN (Our Model)  ViT + EfficientNetB2 + FPN (Our Model) | 0.9783  0.9192  0.9896  0.9189  0.9881  **0.9898** | 0.9492  0.8122  0.9746  0.7997  0.9715  0.9797 | 0.9413  0.7895  0.9735  0.7817  0.9691  0.9794 | 0.9445  0.8019  0.9742  0.7906  0.9745  0.9795 | 0.9962  0.9691  0.9987  0.9781  0.9818  0.9822 |
| CN/EMCI | EfficientNetB2  InceptionV3  RegNetx006  Basic ViT  EfficientNetB2+FPN (Our Model)  ViT + EfficientNetB2 + FPN (Our Model) | 0.9769  0.8983  0.9883  0.9247  0.9850  **0.9892** | 0.9428  0.7712  0.9718  0.8283  0.9650  0.9728 | 0.9438  0.7912  0.9683  0.8012  0.9600  0.9382 | 0.9427  0.7812  0.9742  0.8140  0.9628  0.9548 | 0.9849  0.9591  0.9819  0.9699  0.9875  0.9884 |
| AD/MCI | EfficientNetB2  InceptionV3  RegNetx006  Basic ViT  EfficientNetB2+FPN (Our Model)  ViT + EfficientNetB2 + FPN (Our Model) | 0.9819  0.9383  0.9881  0.9239  **0.9900**  0.9890 | 0.9592  0.8619  0.9891  0.8634  0.9864  0.9508 | 0.9521  0.8371  0.9721  0.7898  0.9737  0.9491 | 0.9540  0.8492  0.9795  0.8276  0.9798  0.9502 | 0.9920  0.9781  0.9961  0.9695  0.9986  0.9818 |
| AD/LMCI | EfficientNetB2  InceptionV3  RegNetx006  Basic ViT  EfficientNetB2+FPN (Our Model)  ViT + EfficientNetB2 + FPN (Our Model) | 0.9449  0.9693  0.9942  0.9757  **0.9945**  0.9697 | 0.8544  0.9382  0.9809  0.9369  0.9868  0.9268 | 0.8529  0.9193  0.9891  0.9371  0.9856  0.9215 | 0.8515  0.9283  0.9799  0.9360  0.9850  0.9226 | 0.9733  0.9955  0.9973  0.9947  0.9988  0.9503 |
| AD/EMCI | EfficientNetB2  InceptionV3  RegNetx006  Basic ViT  EfficientNetB2+FPN (Our Model)  ViT + EfficientNetB2 + FPN (Our Model) | 0.9895  0.9482  0.9822  0.9683  **0.9919**  0.9475 | 0.9742  0.8910  0.9810  0.9099  0.9813  0.8741 | 0.9739  0.8618  0.9701  0.9074  0.9780  0.8614 | 0.9740  0.8783  0.9748  0.9072  0.9791  0.8687 | 0.9917  0.9891  0.9946  0.9889  0.9988  0.9261 |
| MCI/LMCI | EfficientNetB2  InceptionV3  RegNetx006  Basic ViT  EfficientNetB2+FPN (Our Model)  ViT + EfficientNetB2 + FPN (Our Model) | 0.9518  0.8973  0.9881  0.9181  **0.9891**  0.9887 | 0.9129  0.7672  0.9784  0.7896  0.9737  0.9621 | 0.9192  0.7221  0.9794  0.7724  0.9717  0.9612 | 0.9172  0.7435  0.9782  0.7797  0.9701  0.9626 | 0.9839  0.9719  0.9889  0.9691  0.9985  0.9808 |
| MCI/EMCI | EfficientNetB2  InceptionV3  RegNetx006  Basic ViT  EfficientNetB2+FPN (Our Model)  ViT + EfficientNetB2 + FPN (Our Model) | 0.9749  0.8771  0.9795  0.9164  **0.9888**  0.9862 | 0.9317  0.7219  0.9484  0.8091  0.9739  0.8496 | 0.9311  0.6329  0.9463  0.7793  0.9700  0.8278 | 0.9290  0.6736  0.9461  0.7934  0.9702  0.8393 | 0.9820  0.9219  0.9871  0.9655  0.9984  0.9540 |
| LMCI/EMCI | EfficientNetB2  InceptionV3  RegNetx006  Basic ViT  EfficientNetB2+FPN (Our Model)  ViT + EfficientNetB2 + FPN (Our Model) | 0.9839  0.9481  0.9871  0.9695  0.9846  **0.9877** | 0.9744  0.8692  0.9883  0.9294  0.9771  0.9861 | 0.9753  0.8516  0.9845  0.9174  0.9756  0.9820 | 0.9741  0.8594  0.9871  0.9237  0.9771  0.9840 | 0.9912  0.9771  0.9713  0.9723  0.9893  0.9932 |
