# Supplementary material for: Improving Early Detection of Alzheimer's Disease Through MRI Slice Selection and Deep Learning Techniques
Source: Research Square preprint supplement (doi:10.21203/rs.3.rs-6138954/v1), 2025-04-21
Supplement: Supplementary file 4 [file 3b956418f8746f5b60775bbc.docx]

Table 11. z-scores of architectures for with SSIM selected slices in Alzheimer's prediction.

| 1 vs. 1 | CN vs. AD | | | | | |
| --- | --- | --- | --- | --- | --- | --- |
|  | EfficientNetB2 | InceptionV3 | RegNetx006 | Basic ViT | EfficientNetB2+FPN | ViT+EfficientNetB2+FPN |
| EfficientNetB2 |  | **←3.01E-24** | **↑**0.2918 | **←3.42E-21** | **↑**0.3657 | **↑**0.3074 |
| InceptionV3 |  |  | **↑1.60E-28** | **↑**0.2971 | **↑1.54E-27** | **↑2.55E-28** |
| RegNetx006 |  |  |  | **←2,99E-24** | **↑**0.9165 | **↑**1.000 |
| Basic ViT |  |  |  |  | **↑4.91E-26** | **↑5.27E-25** |
| EfficientNetB2+FPN |  |  |  |  |  | **←**0.9146 |
| ViT+EfficientNetB2+FPN |  |  |  |  |  |  |
|  | CN vs. MCI | | | | | |
| EfficientNetB2 |  | **←3.67E-13** | **↑1.42E-07** | **←5.03E-23** | **↑1.42E-07** | **↑**0.1093 |
| InceptionV3 |  |  | **↑4.76E-32** | **←**0.0656 | **↑2.90E-33** | **↑5.54E-19** |
| RegNetx006 |  |  |  | **←3.06E-40** | **←**1.000 | **←1.02E-04** |
| Basic ViT |  |  |  |  | **↑3.06E-40** | **↑4.79E-26** |
| EfficientNetB2+FPN |  |  |  |  |  | **↑7.48E-05** |
| ViT+EfficientNetB2+FPN |  |  |  |  |  |  |
|  | CN vs. LMCI | | | | | |
| EfficientNetB2 |  | **←5.37E-16** | **↑0.033** | **←2.56E-16** | **↑0.026** | **↑0.026** |
| InceptionV3 |  |  | **↑2.82E-22** | **↑**0.9123 | **↑1.14E-22** | **↑1.67E-23** |
| RegNetx006 |  |  |  | **←6.92E-22** | **↑**0.9042 | **↑**0.9042 |
| Basic ViT |  |  |  |  | **↑2.81E-22** | **↑1.10E-22** |
| EfficientNetB2+FPN |  |  |  |  |  | **↑**1.000 |
| ViT+EfficientNetB2+FPN |  |  |  |  |  |  |
|  | CN vs. EMCI | | | | | |
| EfficientNetB2 |  | **←1.11E-29** | **↑0.0014** | **←4.07E-13** | **↑6.82E-04** | **↑8.12E-04** |
| InceptionV3 |  |  | **↑1.76E-39** | **↑6.61E-05** | **↑3.59E-41** | **↑5.84E-41** |
| RegNetx006 |  |  |  | **←1.01E-24** | **←**1.000 | **↑**0.898 |
| Basic ViT |  |  |  |  | **↑4.18E-23** | **↑6.62E-23** |
| EfficientNetB2+FPN |  |  |  |  |  | **↑**0.884 |
| ViT+EfficientNetB2+FPN |  |  |  |  |  |  |
|  | AD vs. MCI | | | | | |
| EfficientNetB2 |  | **←2.02E-24** | **↑**1.000 | **←1.10E-13** | **↑**0.0679 | **↑**1.000 |
| InceptionV3 |  |  | **↑5.47E-25** | **←6.02E-04** | **↑1.09E-28** | **↑1.06E-24** |
| RegNetx006 |  |  |  | **←2.81E-13** | **↑**0.0588 | **↑**1.000 |
| Basic ViT |  |  |  |  | **↑5.04E-19** | **↑1.78E-13** |
| EfficientNetB2+FPN |  |  |  |  |  | **←**0.0679 |
| ViT+EfficientNetB2+FPN |  |  |  |  |  |  |
|  | AD vs. LMCI | | | | | |
| EfficientNetB2 |  | **↑**0.1172 | **↑4.18E-04** | **↑0.0133** | **↑2.56E-04** | **↑**0.1282 |
| InceptionV3 |  |  | **↑0.0253** | **↑**0.2971 | **↑0.0184** | **←**1.000 |
| RegNetx006 |  |  |  | **←**0.1967 | **↑**1.000 | **←0.0184** |
| Basic ViT |  |  |  |  | **↑**0.1655 | **←**0.2971 |
| EfficientNetB2+FPN |  |  |  |  |  | **←0.0253** |
| ViT+EfficientNetB2+FPN |  |  |  |  |  |  |
|  | AD vs. EMCI | | | | | |
| EfficientNetB2 |  | **←6.33E-05** | **←0.0143** | **←0.0028** | **↑**0.763 | **←1.86E-06** |
| InceptionV3 |  |  | **↑4.32E-08** | **↑**0.1489 | **↑2.38E-05** | **←**0.5287 |
| RegNetx006 |  |  |  | **←7.74E-06** | **↑0.0253** | **←3.30E-09** |
| Basic ViT |  |  |  |  | **↑0.0027** | **←0.0431** |
| EfficientNetB2+FPN |  |  |  |  |  | **←1.14E-06** |
| ViT+EfficientNetB2+FPN |  |  |  |  |  |  |
|  | MCI vs. LMCI | | | | | |
| EfficientNetB2 |  | **←2.68E-07** | **↑2.75E-04** | **←3.09E-05** | **↑3.36E-04** | **↑6.64E-08** |
| InceptionV3 |  |  | **↑6.36E-16** | **↑**0.4817 | **↑2.94E-15** | **↑**0.4982 |
| RegNetx006 |  |  |  | **←2.81E-13** | **↑**1.000 | **↑5.69E-18** |
| Basic ViT |  |  |  |  | **↑4.05E-14** | **↑**0.1552 |
| EfficientNetB2+FPN |  |  |  |  |  | **←2.87E-17** |
| ViT+EfficientNetB2+FPN |  |  |  |  |  |  |
|  | MCI vs. EMCI | | | | | |
| EfficientNetB2 |  | **←**0.1037 | **↑0.0047** | **←1.47E-09** | **↑0.0047** | **↑**0.9055 |
| InceptionV3 |  |  | **↑7.42E-06** | **↑1.85E-06** | **↑1.42E-05** | **↑**0.1311 |
| RegNetx006 |  |  |  | **←2.30E-18** | **↑**1.000 | **↑0.0033** |
| Basic ViT |  |  |  |  | **↑2.11E-16** | **↑6.76E-10** |
| EfficientNetB2+FPN |  |  |  |  |  | **←0.0033** |
| ViT+EfficientNetB2+FPN |  |  |  |  |  |  |
|  | LMCI vs. EMCI | | | | | |
| EfficientNetB2 |  | **←3.47E-04** | **↑**0.7389 | **←0.0290** | **↑**0.7389 | **↑0.0011** |
| InceptionV3 |  |  | **↑0.0027** | **↑**0.1779 | **↑0.0027** | **↑**1.0000 |
| RegNetx006 |  |  |  | **←**0.0593 | **←**1.0000 | **↑0.0027** |
| Basic ViT |  |  |  |  | **↑**0.0593 | **↑**0.2230 |
| EfficientNetB2+FPN |  |  |  |  |  | **↑0.0027** |
| ViT+EfficientNetB2+FPN |  |  |  |  |  |  |
