# Supplementary material for: Improving Early Detection of Alzheimer's Disease Through MRI Slice Selection and Deep Learning Techniques
Source: Research Square preprint supplement (doi:10.21203/rs.3.rs-6138954/v1), 2025-04-21
Supplement: Supplementary file 5 [file 5bfc3db16fb5b791f067306d.docx]

Table 8 The potential results of the two classifiers.

| z score | Classifier A Failed | Classifier A Succeeded |
| --- | --- | --- |
| Classifier B Failed | Nff | Nsf |
| Classifier B Succeeded | Nfs | Nss |
