# Supplementary material for: Improving Early Detection of Alzheimer's Disease Through MRI Slice Selection and Deep Learning Techniques
Source: Research Square preprint supplement (doi:10.21203/rs.3.rs-6138954/v1), 2025-04-21
Supplement: Supplementary file 6 [file 6e0df6da076d763245f89460.docx]

Table 5. Classification results obtained when the models are run (5 slices with SSIM)

| Models | Accuracy | Precision | Recall | F1 Score | AUC |
| --- | --- | --- | --- | --- | --- |
| EfficientNetB2 | 0.9688 | 0.9312 | 0.9110 | 0.9178 | 0.9886 |
| InceptionV3 | 0.8875 | 0.7533 | 0.6508 | 0.6995 | 0.9345 |
| RegNetx006 | **0.9889** | 0.9733 | 0.9713 | 0.9701 | 0.9981 |
| Basic ViT | 0.9362 | 0.8487 | 0.8288 | 0.8390 | 0.9777 |
| EfficientNetB2+FPN (Our Model) | 0.9874 | 0.9734 | 0.9633 | 0.9671 | 0.9974 |
| ViT+ EfficientNetB2+FPN (Our model) | 0.9517 | 0.8593 | 0.7585 | 0.8065 | 0.9078 |
