# Supplementary material for: Improving Early Detection of Alzheimer's Disease Through MRI Slice Selection and Deep Learning Techniques
Source: Research Square preprint supplement (doi:10.21203/rs.3.rs-6138954/v1), 2025-04-21
Supplement: Supplementary file 7 [file 9590b77cce0727e470c3975a.docx]

**Table 14.** Training times with 1 vs. 1 (5 slices selected manually).

| 1 vs. 1 | Models | Estimated  Epoch Duration | Total Training Time |
| --- | --- | --- | --- |
| CN/AD | EfficientNetB2  InceptionV3  RegNetx006  Basic ViT  EfficientNetB2+FPN (Our Model)  ViT + EfficientNetB2 + FPN (Our Model) | 39 seconds  52 seconds  46 seconds  65 seconds  78 seconds  98 seconds | 6.5 minutes  8.7 minutes  7.6 minutes  10.8 minutes  13 minutes  16.3 minutes |
| CN/MCI | EfficientNetB2  InceptionV3  RegNetx006  Basic ViT  EfficientNetB2+FPN (Our Model)  ViT + EfficientNetB2 + FPN (Our Model) | 49 seconds  65 seconds  58 seconds  82 seconds  98 seconds  123 seconds | 8.2 minutes  10.9 minutes  9.6 minutes  13.7 minutes  16.4 minutes  20.5 minutes |
| CN/LMCI | EfficientNetB2  InceptionV3  RegNetx006  Basic ViT  EfficientNetB2+FPN (Our Model)  ViT + EfficientNetB2 + FPN (Our Model) | 36 seconds  47 seconds  42 seconds  59 seconds  71 seconds  89 seconds | 6 minutes  7.9 minutes  7.0 minutes  9.9 minutes  11.9 minutes  14.9 minutes |
| CN/EMCI | EfficientNetB2  InceptionV3  RegNetx006  Basic ViT  EfficientNetB2+FPN (Our Model)  ViT + EfficientNetB2 + FPN (Our Model) | 38 seconds  50 seconds  44 seconds  63 seconds  76 seconds  95 seconds | 6.3 minutes  8.4 minutes  7.4 minutes  10.5 minutes  12.6 minutes  15.8 minutes |
| AD/MCI | EfficientNetB2  InceptionV3  RegNetx006  Basic ViT  EfficientNetB2+FPN (Our Model)  ViT + EfficientNetB2 + FPN (Our Model) | 20 seconds  26 seconds  23 seconds  33 seconds  40 seconds  50 seconds | 3.3 minutes  4.4 minutes  3.85 minutes  5.5 minutes  6.6 minutes  8.25 minutes |
| AD/LMCI | EfficientNetB2  InceptionV3  RegNetx006  Basic ViT  EfficientNetB2+FPN (Our Model)  ViT + EfficientNetB2 + FPN (Our Model) | 6 seconds  8 seconds  7 seconds  11 seconds  13 seconds  16 seconds | 1.05 minutes  1.4 minutes  1.2 minutes  1.75 minutes  2.1 minutes  2.6 minutes |
| AD/EMCI | EfficientNetB2  InceptionV3  RegNetx006  Basic ViT  EfficientNetB2+FPN (Our Model)  ViT + EfficientNetB2 + FPN (Our Model) | 8 seconds  11 seconds  10 seconds  14 seconds  17 seconds  21 seconds | 1.4 minutes  1.87 minutes  1.63 minutes  2.33 minutes  2.8 minutes  3.5 minutes |
| MCI/LMCI | EfficientNetB2  InceptionV3  RegNetx006  Basic ViT  EfficientNetB2+FPN (Our Model)  ViT + EfficientNetB2 + FPN (Our Model) | 17 seconds  22 seconds  19 seconds  28 seconds  33 seconds  41 seconds | 2.75 minutes  3.67 minutes  3.2 minutes  4.58 minutes  5.5 minutes  6.88 minutes |
| MCI/EMCI | EfficientNetB2  InceptionV3  RegNetx006  Basic ViT  EfficientNetB2+FPN (Our Model)  ViT + EfficientNetB2 + FPN (Our Model) | 19 seconds  25 seconds  22 seconds  31 seconds  37 seconds  47 seconds | 3.1 minutes  4.13 minutes  3.62 minutes  5.17 minutes  6.2 minutes  7.75 minutes |
| LMCI/EMCI | EfficientNetB2  InceptionV3  RegNetx006  Basic ViT  EfficientNetB2+FPN (Our Model)  ViT + EfficientNetB2 + FPN (Our Model) | 5 seconds  7 seconds  6 seconds  8 seconds  10 seconds  13 seconds | 0.85 minutes  1.13 minutes  1.0 minutes  1.42 minutes  1.7 minutes  2.1 minutes |
