# Supplementary material for: Improving Early Detection of Alzheimer's Disease Through MRI Slice Selection and Deep Learning Techniques
Source: Research Square preprint supplement (doi:10.21203/rs.3.rs-6138954/v1), 2025-04-21
Supplement: Supplementary file 8 [file b77cb42f1d72c31a9fb9d5d8.docx]

Table 4. Classification results obtained when the models are run (5 slices manually)

| Models | Accuracy | Precision | Recall | F1 Score | AUC |
| --- | --- | --- | --- | --- | --- |
| EfficientNetB2 | 0.9177 | 0.8244 | 0.7478 | 0.7834 | 0.9569 |
| InceptionV3 | 0.8788 | 0.7148 | 0.6556 | 0.6864 | 0.9381 |
| RegNetx006 | **0.9712** | 0.9345 | 0.9203 | 0.9268 | 0.9929 |
| Basic ViT | 0.8898 | 0.7678 | 0.6981 | 0.7302 | 0.9482 |
| EfficientNetB2+FPN (Our Model) | 0.9473 | 0.9315 | 0.9029 | 0.9167 | 0.9714 |
| ViT+ EfficientNetB2+FPN (Our model) | 0.9091 | 0.9082 | 0.7089 | 0.7978 | 0.9021 |
