# Supplementary material for: Improving Early Detection of Alzheimer's Disease Through MRI Slice Selection and Deep Learning Techniques
Source: Research Square preprint supplement (doi:10.21203/rs.3.rs-6138954/v1), 2025-04-21
Supplement: Supplementary file 9 [file d70098654025f8b896f87127.docx]

Table 9. z scores and confidence levels.

| z score | One-tailed prediction | Two-tailed prediction |
| --- | --- | --- |
| 1.345 | 95% | 90% |
| 1.960 | 97.5% | 95% |
| 2.326 | 99% | 98% |
| 2.576 | 99.5% | 99% |
|  |  |  |
