# Supplementary material for: Improving Early Detection of Alzheimer's Disease Through MRI Slice Selection and Deep Learning Techniques
Source: Research Square preprint supplement (doi:10.21203/rs.3.rs-6138954/v1), 2025-04-21
Supplement: Supplementary file 10 [file e4e33cdf99e330d5a0727f3c.docx]

Table 2. Properties of the hyperparameters used in the model

| HyperParameters | Value |
| --- | --- |
| Optimization algorithm | Adam |
| Learning Rate | 0.001 |
| Epoch | 10 |
| Batch Size | 16 |
