# Supplementary material for: Improving Early Detection of Alzheimer's Disease Through MRI Slice Selection and Deep Learning Techniques
Source: Research Square preprint supplement (doi:10.21203/rs.3.rs-6138954/v1), 2025-04-21
Supplement: Supplementary file 11 [file e8384c3e6d6cd58bdc3d19be.docx]

**Table 12.** Training times with (5 slices selected manually).

| Models | Parameter Numbers | Model Size | Inference Speed | | Estimated  Epoch Duration | Total Training Time |
| --- | --- | --- | --- | --- | --- | --- |
| EfficientNetB2  InceptionV3  RegNetx006  Basic ViT  EfficientNetB2+FPN (Our Model)  ViT + EfficientNetB2 + FPN (Our Model) | 9.2M  23.9M  6.2M  86.0M  9.5M  95M | 8MB  92MB  120MB  200MB  15MB  250MB | | 50ms  100ms  40ms  200ms  80ms  250ms | 8 minutes  12 minutes  7 minutes  18 minutes  10 minutes  20 minutes | 1.3 hours  2.0 hours  1.2 hours  3.0 hours  1.7 hours  3.3 hours |
|  |  |  | |  |  |  |
