# Supplementary material for: Improving Early Detection of Alzheimer's Disease Through MRI Slice Selection and Deep Learning Techniques
Source: Research Square preprint supplement (doi:10.21203/rs.3.rs-6138954/v1), 2025-04-21
Supplement: Supplementary file 12 [file f26d610e55f264a4054bd228.docx]

Table 3. Individuals and total number of scans

| Class | Individuals | Total Scans |
| --- | --- | --- |
| CN | 365 | 19926 |
| EMCI | 37 | 4253 |
| MCI | 160 | 10285 |
| LMCI | 15 | 1826 |
| AD | 50 | 6380 |
