# Supplementary material for: Improving Early Detection of Alzheimer's Disease Through MRI Slice Selection and Deep Learning Techniques
Source: Research Square preprint supplement (doi:10.21203/rs.3.rs-6138954/v1), 2025-04-21
Supplement: Supplementary file 13 [file f41141869cb301c6206d8be4.docx]

Table 1. Summary of Literature Studies

| Reference | Year | Dataset | Models | Class | Accuracy |
| --- | --- | --- | --- | --- | --- |
| Cholli & Naveen | 2024 | ADNI | VGG-19  ResNet-50  InceptionV3 | CN  EMCI  MCI  LMCI  AD | 97.54%  97.16%  98.70% |
| Duan et al. | 2023 | ADNI-3 | Aux-ViT | AD vs. CN | 89.58% |
| Kadri et al. | 2022 | ADNI  OASIS | DenseNet121  Proposed ViT | AD, CN | 86.00%  96.00% |
| Liu et al. | 2023 | ADNI-1  ADNI-2 | TriFormer (ViT) | AD, MCI, CN | 77.31%  84.10% |
| Chen et al. | 2024 | ADNI | LongFormer (ViT) | AD, MCI, CN | 93.43% |
| Chen et al. | 2024 | ADNI | AliFuse (ViT) | AD, MCI, CN | 87.93% |
| Gamal et al. | 2022 | ADNI | CNN+ ViT (ensemble) | AD vs. CN  AD vs. MCI  MCI vs. CN | 89.46%  78.60%  78.86% |
| Şener et al. | 2024 | ADNI-3 | EfficientNetB0  EfficientNetB0  DenseNet121 | CN vs. AD  MCI vs. AD  CN vs. MCI | 98.94%  97.95%  98.42% |
