# Supplementary material for: Improving Early Detection of Alzheimer's Disease Through MRI Slice Selection and Deep Learning Techniques
Source: Research Square preprint supplement (doi:10.21203/rs.3.rs-6138954/v1), 2025-04-21
Supplement: Supplementary file 14 [file fcbb91a277ae122b5c802e3d.docx]

**Table 13.** Training times (5 slices selected with SSIM).

| Models | Parameter Numbers | Model Size | Inference Speed | | Estimated  Epoch Duration | Total Training Time |
| --- | --- | --- | --- | --- | --- | --- |
| EfficientNetB2  InceptionV3  RegNetx006  Basic ViT  EfficientNetB2+FPN (Our Model)  ViT + EfficientNetB2 + FPN (Our Model) | 9.2M  23.9M  6.2M  86.0M  9.5M  95M | 8MB  92MB  120MB  200MB  15MB  250MB | | 50ms  100ms  40ms  200ms  80ms  250ms | 7.2 minutes  10.8 minutes  6.3 minutes  16.2 minutes  9.0 minutes  18 minutes | 1.2 hours  1.8 hours  1.1 hours  2.7 hours  1.5 hours  3.0 hours |
|  |  |  | |  |  |  |
