# Supplementary material for: Improving Early Detection of Alzheimer's Disease Through MRI Slice Selection and Deep Learning Techniques
Source: Research Square preprint supplement (doi:10.21203/rs.3.rs-6138954/v1), 2025-04-21
Supplement: Supplementary file 15 [file fe7c676bc11b7c1035875a7c.docx]

**Table 15.** Training times with 1 vs. 1 (5 slices selected with SSIM).

| 1 vs. 1 | Models | Estimated  Epoch Duration | Total Training Time |
| --- | --- | --- | --- |
| CN/AD | EfficientNetB2  InceptionV3  RegNetx006  Basic ViT  EfficientNetB2+FPN (Our Model)  ViT + EfficientNetB2 + FPN (Our Model) | 33 seconds  47 seconds  39 seconds  60 seconds  71 seconds  90 seconds | 5.8 minutes  7.5 minutes  6.2 minutes  8.3 minutes  12 minutes  15.1 minutes |
| CN/MCI | EfficientNetB2  InceptionV3  RegNetx006  Basic ViT  EfficientNetB2+FPN (Our Model)  ViT + EfficientNetB2 + FPN (Our Model) | 41 seconds  59 seconds  51 seconds  77 seconds  85 seconds  119 seconds | 7.1 minutes  8.5 minutes  8.7 minutes  12.5 minutes  15.3 minutes  19.3 minutes |
| CN/LMCI | EfficientNetB2  InceptionV3  RegNetx006  Basic ViT  EfficientNetB2+FPN (Our Model)  ViT + EfficientNetB2 + FPN (Our Model) | 31 seconds  39 seconds  38 seconds  49 seconds  69 seconds  75 seconds | 4.8 minutes  6.4 minutes  6.3 minutes  8.4 minutes  10.4 minutes  13.6 minutes |
| CN/EMCI | EfficientNetB2  InceptionV3  RegNetx006  Basic ViT  EfficientNetB2+FPN (Our Model)  ViT + EfficientNetB2 + FPN (Our Model) | 38 seconds  50 seconds  44 seconds  63 seconds  76 seconds  95 seconds | 5.3 minutes  7.2 minutes  6.1 minutes  9.6 minutes  11.4 minutes  14.3 minutes |
| AD/MCI | EfficientNetB2  InceptionV3  RegNetx006  Basic ViT  EfficientNetB2+FPN (Our Model)  ViT + EfficientNetB2 + FPN (Our Model) | 18 seconds  22 seconds  16 seconds  25 seconds  30 seconds  45 seconds | 2.1 minutes  3.4 minutes  2.6 minutes  4.3 minutes  5.6 minutes  7.5 minutes |
| AD/LMCI | EfficientNetB2  InceptionV3  RegNetx006  Basic ViT  EfficientNetB2+FPN (Our Model)  ViT + EfficientNetB2 + FPN (Our Model) | 5 seconds  7 seconds  7 seconds  8 seconds  11 seconds  12 seconds | 1.01 minutes  1.2 minutes  1.1 minutes  1.43 minutes  1.8 minutes  1.6 minutes |
| AD/EMCI | EfficientNetB2  InceptionV3  RegNetx006  Basic ViT  EfficientNetB2+FPN (Our Model)  ViT + EfficientNetB2 + FPN (Our Model) | 7 seconds  9 seconds  9 seconds  11 seconds  16 seconds  18 seconds | 1.2 minutes  1.56 minutes  1.43 minutes  1.29 minutes  1.5 minutes  2.6 minutes |
| MCI/LMCI | EfficientNetB2  InceptionV3  RegNetx006  Basic ViT  EfficientNetB2+FPN (Our Model)  ViT + EfficientNetB2 + FPN (Our Model) | 15 seconds  17 seconds  13 seconds  18 seconds  27 seconds  38 seconds | 2.43 minutes  2.52 minutes  2.8 minutes  3.21 minutes  4.2 minutes  5.91 minutes |
| MCI/EMCI | EfficientNetB2  InceptionV3  RegNetx006  Basic ViT  EfficientNetB2+FPN (Our Model)  ViT + EfficientNetB2 + FPN (Our Model) | 15 seconds  18 seconds  20 seconds  28 seconds  29 seconds  38 seconds | 3.1 minutes  4.13 minutes  3.62 minutes  5.17 minutes  6.2 minutes  7.75 minutes |
| LMCI/EMCI | EfficientNetB2  InceptionV3  RegNetx006  Basic ViT  EfficientNetB2+FPN (Our Model)  ViT + EfficientNetB2 + FPN (Our Model) | 4 seconds  6 seconds  6 seconds  7 seconds  9 seconds  11 seconds | 0.75 minutes  1.10 minutes  1.0 minutes  1.32 minutes  1.67 minutes  2.0 minutes |
